# Supplementary material
Source: PubMed Central journal article supplement (PMC5815909)
Supplement: NIHMS923458-supplement-2.pdf [file NIHMS923458-supplement-2.pdf]

## Additional Supplemental Materials

**Supplemental Figure 1. Progression Free and Overall Survival by Mutation Type**

**A. Progression Free Survival by Mutation Type**

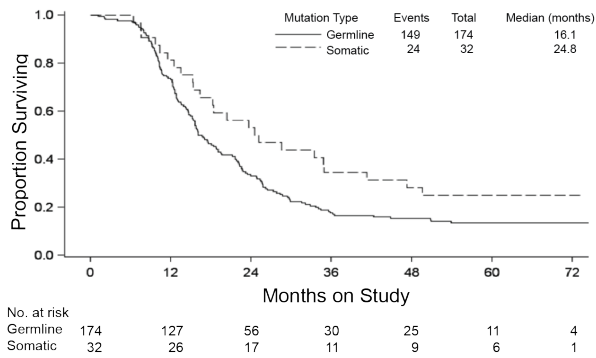

**B. Overall Survival by Mutation Type**

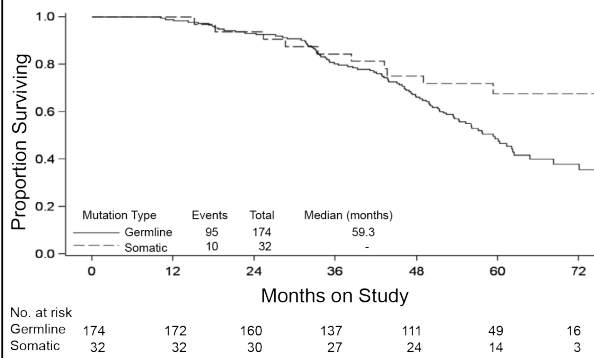

### **Supplemental Figure 1. Progression-free and overall survival by mutation type.**

**A. – B.** Kaplan-Meier curves for progression-free and overall survival by mutation type, comparing the subgroup of 32 OC patients with “definitely somatic” HRR mutations compared to the 174 with “definitely germline” HRR mutations. Germline mutation carriers had a significantly increased hazard of both progression (HR 1.59, 95% CI 1.01 – 2.51,  $p = 0.045$ ) and death (HR 2.32, 95% CI 1.18 – 4.58,  $p = 0.01$ ) when compared to those with somatic mutations. Hazard ratios were adjusted for study treatment, age, size of residual tumor, stage of disease, initial performance status, and mutation type.

**Supplemental Table 2. Mutations by source of sequenced DNA**

| Source of DNA  |                  | DNA from Blood (Germline) N = 788 |                                               |                                   |             |
|----------------|------------------|-----------------------------------|-----------------------------------------------|-----------------------------------|-------------|
|                |                  |                                   | DNA from Tumor (Germline and Somatic) N = 731 |                                   |             |
|                |                  | Blood Only (Germline)             | **Blood and Tumor (Somatic)                   | Tumor Only (Germline and Somatic) | All Sources |
| N (%)          |                  | 464 (38.8)                        | 324 (27.1)                                    | 407 (34.0)                        | 1195 (100)  |
| Mutation Group | <i>BRCA1</i> (%) | 78 (10.0)*                        | 17 (5.2)                                      | 53 (13.0)                         | 148 (12.4)  |
|                | <i>BRCA2</i> (%) | 46 (5.8)*                         | 7 (2.2)                                       | 25 (6.1)                          | 78 (6.5)    |
|                | Other HRR (%)    | 50 (6.3)*                         | 8 (2.5)                                       | 23 (5.7)                          | 81 (6.8)    |
|                | Total HRR (%)    | 174 (22.1)*                       | 32 (9.9)                                      | 101 (24.8)                        | 307 (25.7)  |

\*Percentages calculated out of the total 788 patients with germline testing

\*\*Subset of patients who had negative germline testing, therefore only somatic mutations detected
